# Supplementary material for: Fabrication of a coral/double-wall TiO2 nanotube array film electrode with higher photoelectrocatalytic activity under sunlight
Source: Royal Society of Chemistry journal article supplement (doi:10.1039/c5nj00340g), 2015-01-01
Supplement: c5nj00340g1.pdf [file c5nj00340g1.pdf]

## Electronic Supporting Information

### **Fabrication of coral/double-wall TiO<sub>2</sub> nanotube arrays film electrode with higher photoelectrocatalytic activity under sunlight**

Yan Liu<sup>†</sup>, Kangsheng Mu<sup>†</sup>, Gang Yang, Hong Peng, Fei Shen, Lilin Wang, Shihuai Deng, Xiaohong Zhang, Yanzong Zhang<sup>\*</sup>

Sichuan Engineering and Technical Center for Rural Environmental Protection, College of the Environment, Sichuan Agricultural University, Chengdu 611130, Sichuan, PR China

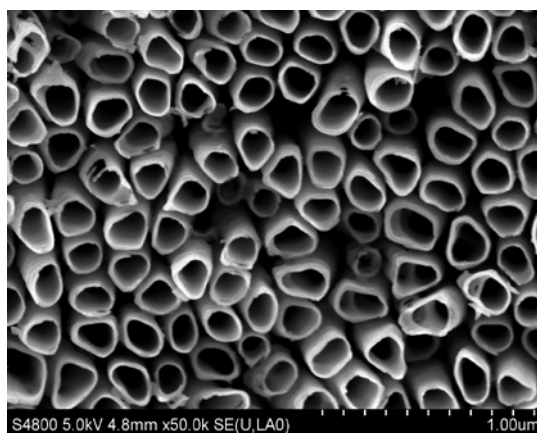

**Figure S1.** TiO<sub>2</sub> nanotube arrays formed at 60 V in 0.6 wt% NH<sub>4</sub>F-10 vol% H<sub>2</sub>O-EG electrolyte for 20 min.

---

<sup>†</sup> These authors contributed equally to this work (co-first authors).

<sup>\*</sup> Corresponding author: E-mail address: yzzhang@sicau.edu.cn (Y. Zhang).

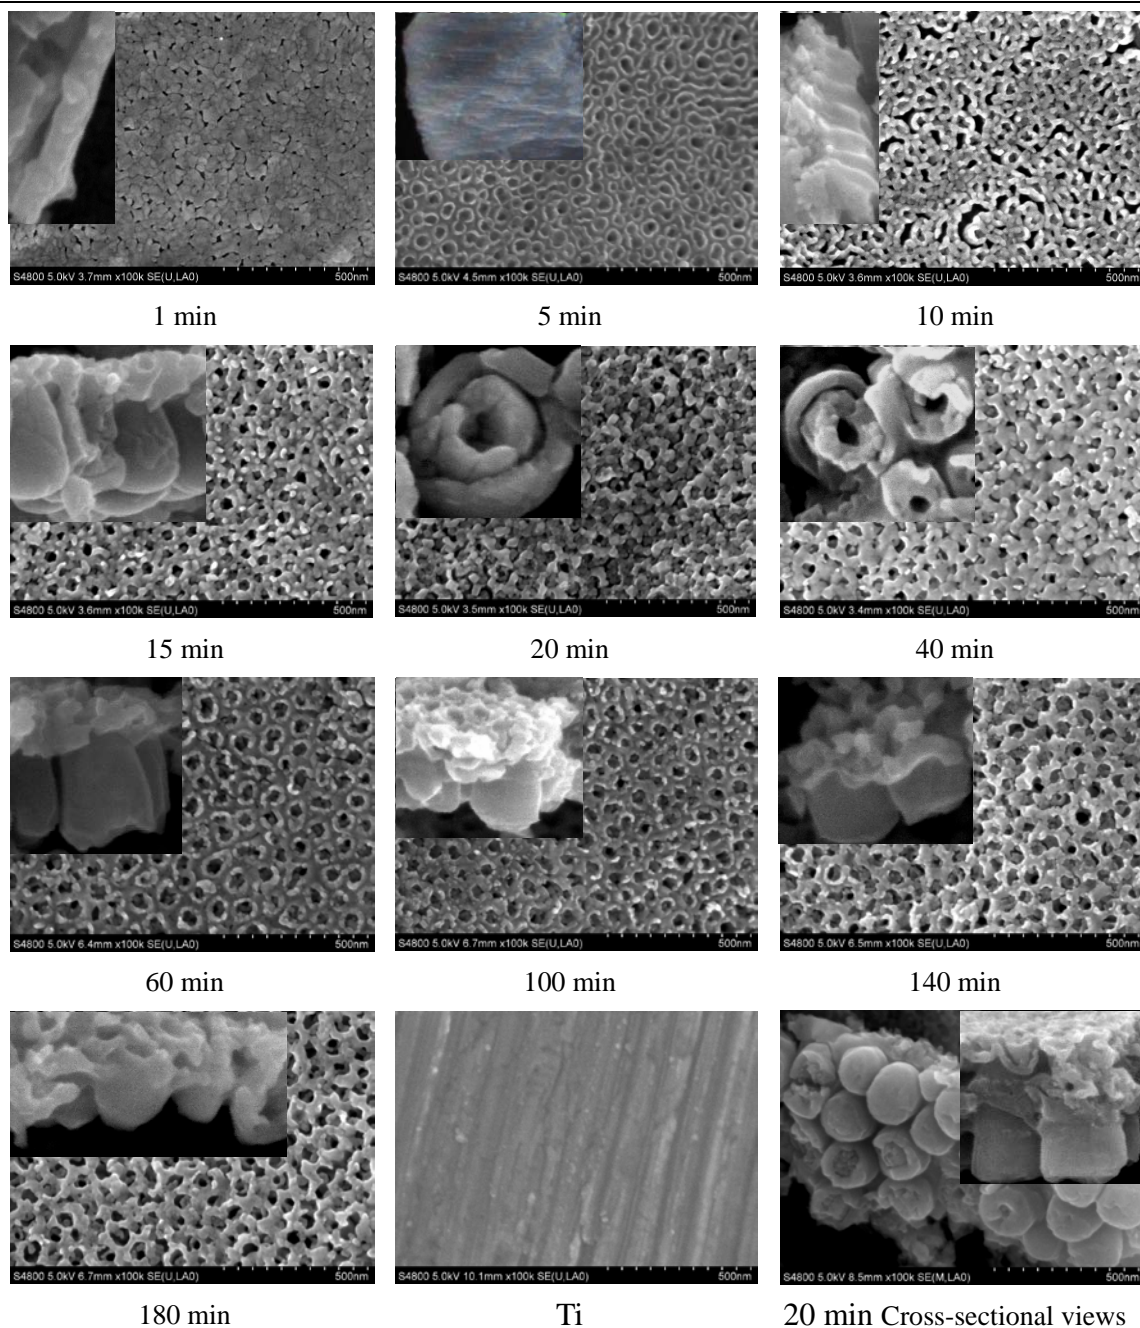

**Figure S2.** FE-SEM top-views of as-prepared Coral/DWNTs  $\text{TiO}_2$  films at 60 V in 0.6 wt% [BMIM][ $\text{BF}_4$ ]/10 vol%  $\text{H}_2\text{O}$ /EG electrolyte at different anodization time: 1 min, 5 min, 10 min, 15 min, 20 min, 40 min, 60 min, 100 min, 140 min, 180 min.

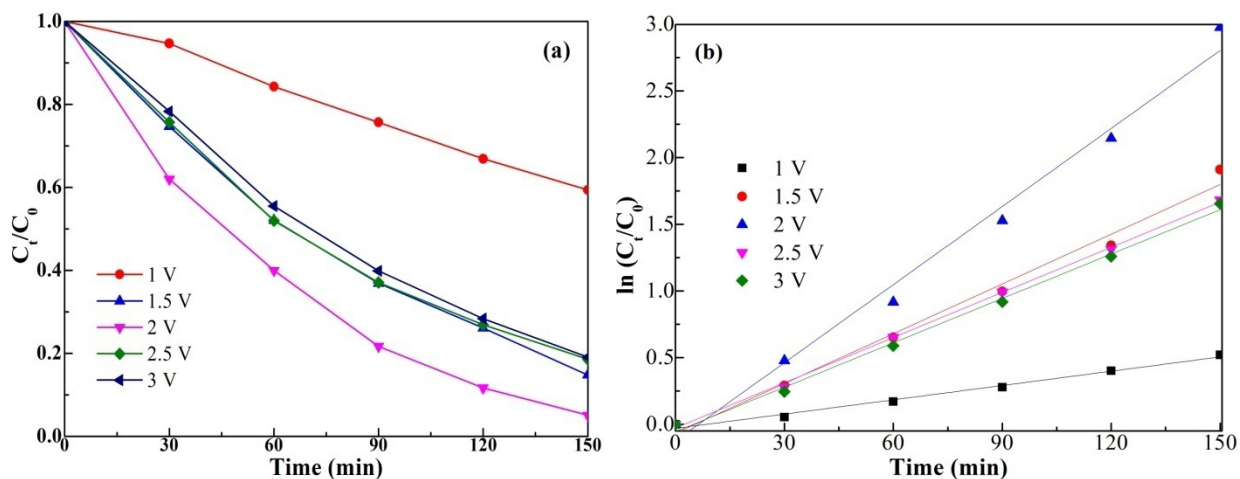

**Figure S3** (a) PEC degradation of MO at different bias voltage. (b)  $\ln(C_0/C_t)$  as a function of irradiation time in PEC degradation of MO at different bias voltage.

**Table S1** Kinetic constants and regression coefficients for PEC degradation at different bias voltage

| Bias voltage (V) | Kinetic constant ( $\text{min}^{-1}$ ) | $R^2$  |
|------------------|----------------------------------------|--------|
| 1.0              | 0.002208                               | 0.9651 |
| 1.5              | 0.005553                               | 0.9954 |
| 2.0              | 0.009748                               | 0.9840 |
| 2.5              | 0.006215                               | 0.9857 |
| 3.0              | 0.005643                               | 0.9986 |
